# Supplementary material for: Aromatic oil from lavender as an atopic dermatitis suppressant
Source: PubMed Central journal article supplement (PMC10769034; doi:10.1371/journal.pone.0296408), 2024-01-05
Supplement: pone.0296408.s002.pdf [file pone.0296408.s002.pdf]

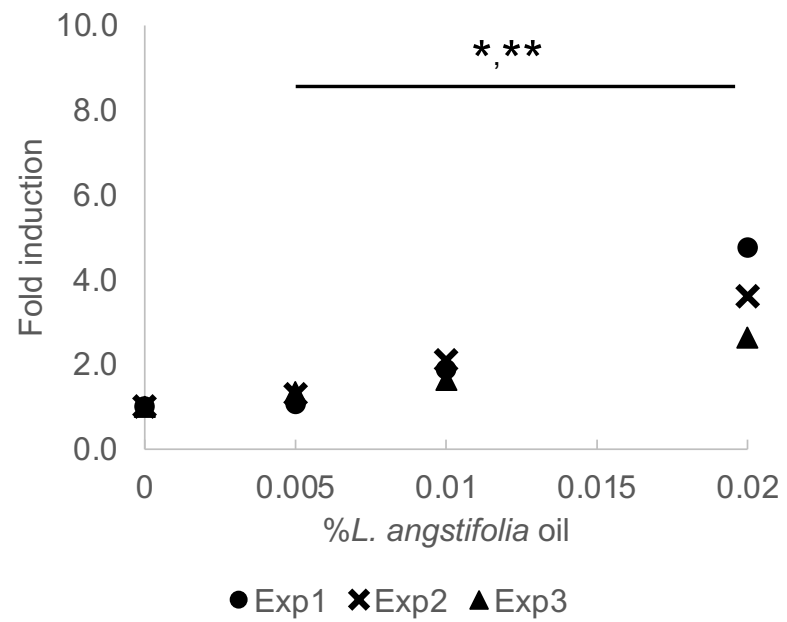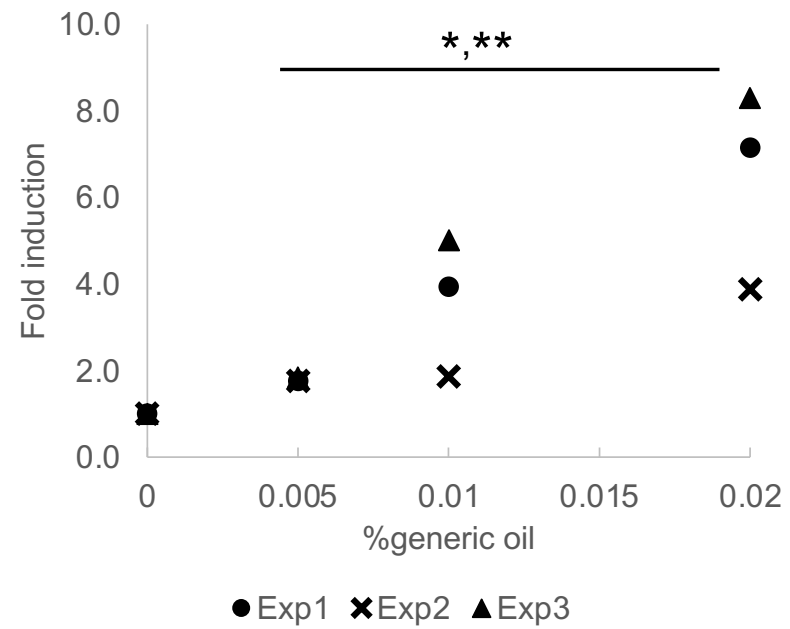

Supplementary Figure S1a

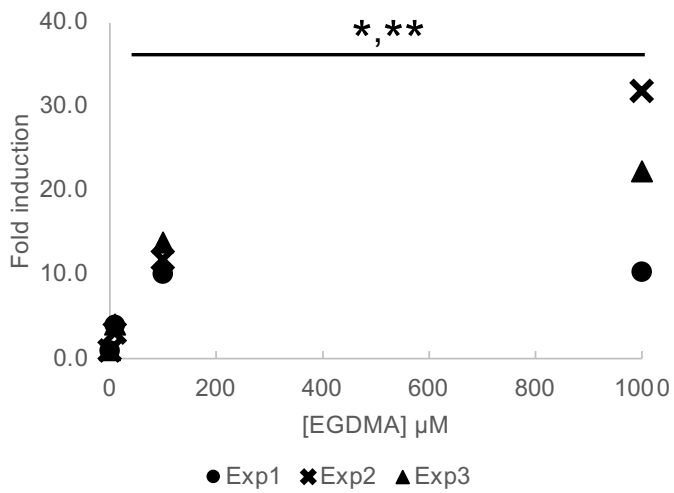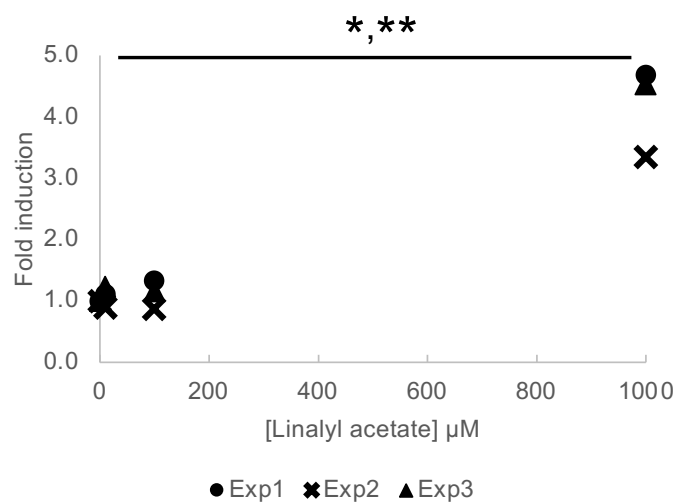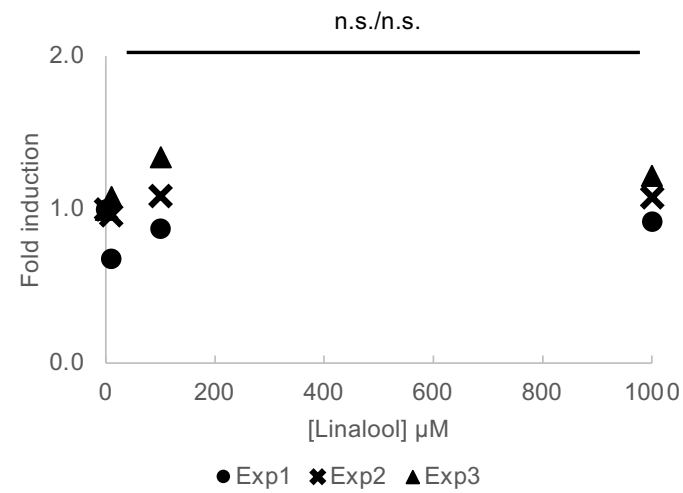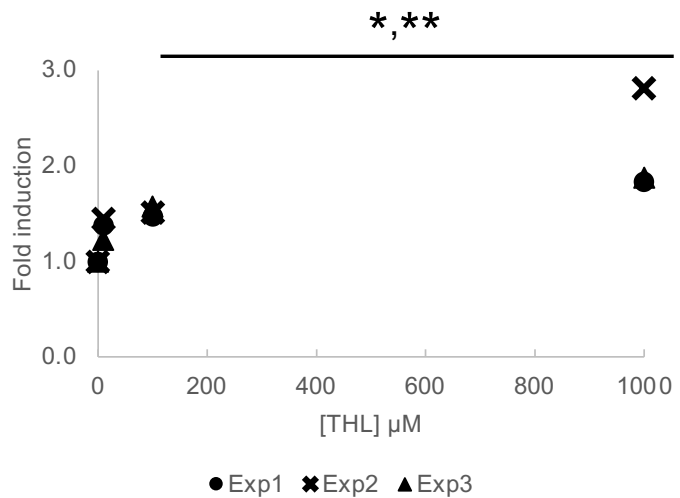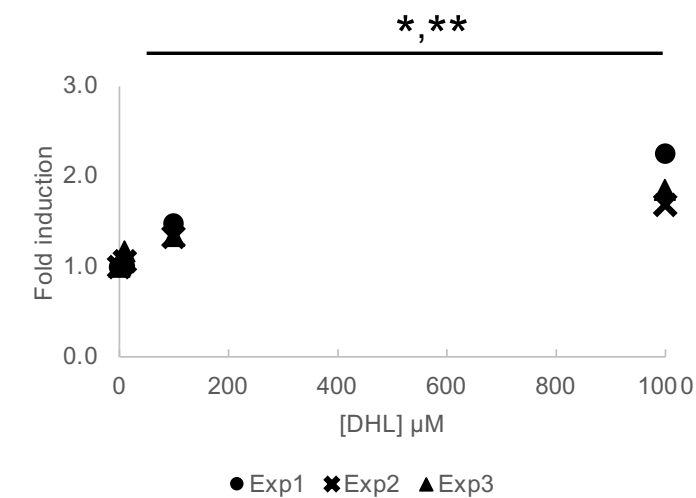

**Supplementary Figure S1b**

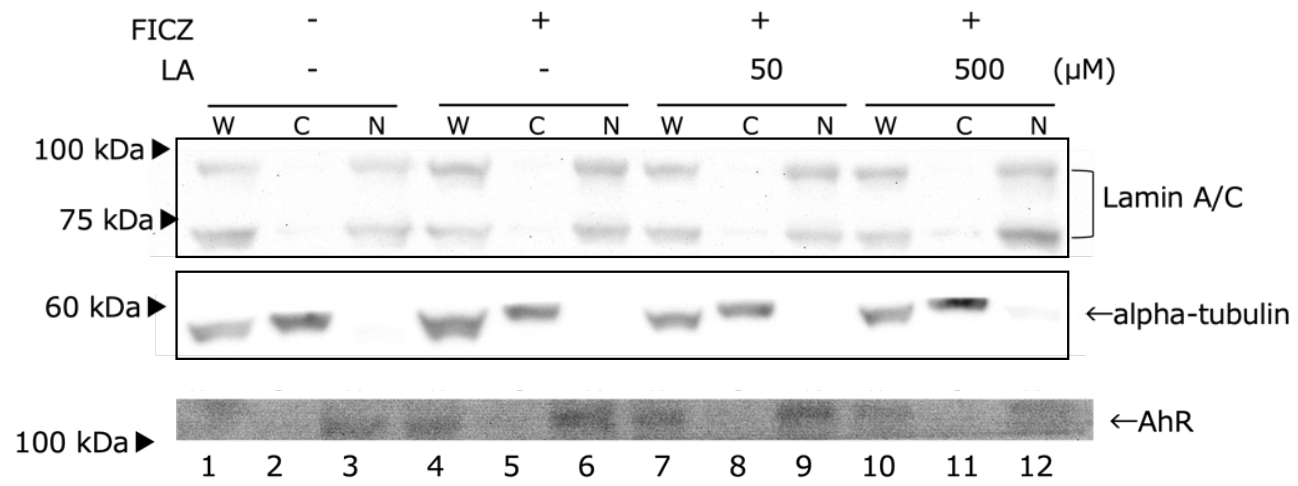

Supplementary Figure S2

Supplementary Table S1. Agents used in this study

| name                                           | Concentration (stock) | solvent     | CAS#        | Brand                                |
|------------------------------------------------|-----------------------|-------------|-------------|--------------------------------------|
| <i>Lavandula angustifolia</i><br>essential oil | -                     | DMSO        | -           | Pranarom                             |
| Generic avender oil                            | -                     | DMSO        | -           | no brand                             |
| Linalool                                       | 5.56 M*               | DMSO        | 78-70-6     | Tokyo Chemical Industry<br>Co., Ltd. |
| Linalyl acetate                                | 4.56 M*               | DMSO        | 115-95-7    | Tokyo Chemical Industry<br>Co., Ltd. |
| Tetrahydrolinalool                             | 5.22 M*               | DMSO        | 78-69-3     | Tokyo Chemical Industry<br>Co., Ltd. |
| 6,7-Dihydrolinalool                            | 5.50 M*               | DMSO        | 18479-49-7  | Santa Cruz Biotechnology             |
| FICZ (6-Formylindolo[3,2-<br>b]carbazole)      | 10 mM                 | DMSO        | 172922-91-7 | Cayman Chemical                      |
| Ethylene glycol<br>dimethacrylate              | 1 M                   | EtOH        | 97-90-5     | Tokyo Chemical Industry<br>Co., Ltd. |
| TNBS                                           | -                     | RPMI+10%FBS | 2508-19-2   | Sigma-Aldrich                        |
| DL-lactic acid                                 | -                     | RPMI+10%FBS | 50-21-5     | Sigma-Aldrich                        |

\*calculated by the following online calculator, <https://www.omnicalculator.com/chemistry/percentage-concentration-to-molarity>

Supplementary Table S2. Primer sets used in this study

| gene           | Forward primer               | Reverse primer                |
|----------------|------------------------------|-------------------------------|
| GAPDH          | 5'-agccacatcgctcagacac-3'    | 5'-gcccataacgaccaaacc-3'      |
| Artemin (ARTN) | 5'-cgctcctgggtggtgatagaga-3' | 5'-gcggagagaccaagtgga-3'      |
| AhR            | 5'-caacatcacctacgccagtc-3'   | 5'-gcttgggaaggatttgacttga-3'  |
| ARNT           | 5'-ctgtcatcctgaagaccagcag-3' | 5'-ctggttctcatccagagccattc-3' |

Supplementary Table S3. Composition analysis table of *L. angustifolia* oil used in this study

| ケモタイプ精油成分分析表<br>(水蒸気蒸留法) |                                                           |             |        |
|--------------------------|-----------------------------------------------------------|-------------|--------|
| 厚生労働大臣登録検査機関による分析結果      |                                                           |             |        |
| 精油名                      | ラベンダー<br>アングスティフォリア (真性)                                  |             |        |
| 学名                       | <i>Lavandula angustifolia</i><br>ssp. <i>angustifolia</i> |             |        |
| 蒸留部位                     | 花穂                                                        |             |        |
| 産地                       | フランス                                                      |             |        |
| ロット番号                    | BLAH140                                                   |             |        |
| 蒸留年月                     | 2019年7月                                                   |             |        |
| 消費期限                     | 2024年11月                                                  |             |        |
| 酸価                       | 0.05                                                      |             |        |
| ケン化価                     | 131.13                                                    |             |        |
| 屈折率 (20℃)                | 1.4615                                                    |             |        |
| 比重 (20℃)                 | 0.8830                                                    |             |        |
| 旋光度 (20℃)                | -10.60°                                                   |             |        |
| 農薬29種類                   | 検出限界0.05ppm                                               | 検出せず        |        |
| モノテルペン炭化水素               | 5.95%                                                     | セスキテルペン炭化水素 | 6.22%  |
| カンフェン                    | 0.26                                                      | αサリボル       | 0.47   |
| βピネン                     | 0.42                                                      | βカフィレン      | 3.58   |
| リネン                      | 0.17                                                      | βフェルセチ      | 2.17   |
| cis-βオシメン                | 2.27                                                      | αピネン        | 1.25%  |
| trans-βオシメン              | 2.57                                                      | 1,8シネオール    | 0.28   |
| αサイメン                    | 0.26                                                      | trans-リナロール | 0.31   |
| モノテルペンアルコール              | 35.32%                                                    | αピネン        | 0.66   |
| リナロール                    | 32.10                                                     | βピネン        | 45.22% |
| テルピネン-4-オール              | 1.46                                                      | αピネン        | 0.14   |
| ラバンズロール                  | 0.30                                                      | βピネン        | 0.22   |
| αテルピネオール                 | 0.78                                                      | βピネン        | 43.28  |
| ネロール                     | 0.19                                                      | βピネン        | 1.28   |
| ゲラニオール                   | 0.49                                                      | βピネン        | 0.30   |
| カトン                      | 1.21%                                                     | βピネン        | 0.13%  |
| 3-オクタノン                  | 0.60                                                      | βピネン        | 0.13%  |
| カンファー                    | 0.61                                                      | βピネン        | 0.13%  |
| 合計                       | 95.30%                                                    |             |        |
| 分析表発行日: 2019年12月3日       |                                                           |             |        |

Essential Oil Composition Analysis Table  
(Steam distillation method)

Analysis by an inspection organization registered with the Minister of Health, Labor and Welfare, in Japan

Essential oil name: Lavender

Angustifolia

Scientific name: *Lavandula angustifolia*

Distillation part: flower ear

Place of origin: France

Lot number: BLAH140

Distillation date: July 2019

Consumption date: November 2024

|                               |              |                            |        |
|-------------------------------|--------------|----------------------------|--------|
| Acid value                    | 0.65         |                            |        |
| Saponification value          | 131.13       |                            |        |
| Refractive index              | 1.4615       |                            |        |
| Specific Gravity              | 0.8830       |                            |        |
| Optical rotation              | -10.60       |                            |        |
| 29 pesticides                 | Not detected |                            |        |
| Monoterpene hydrocarbons      | 5.95%        | Sesquiterpene hydrocarbons | 6.22%  |
| camphene                      | 0.26         | α santalene                | 0.47   |
| β myrcene                     | 0.42         | β                          |        |
| limonene                      | 0.17         | caryophyllene              | 3.58   |
| cis-beta-ocimene              | 2.27         | β farnesene                | 2.17   |
| trans-beta-ocimene            | 2.57         |                            |        |
| p-cymene                      | 0.26         |                            |        |
| Monoterpene alcohols          | 35.32%       | Oxides                     | 1.25%  |
| linalool                      | 32.10        | 1, 8-cineole               | 0.28   |
| terpinen-4-ol                 | 1.46         | trans-linalool             |        |
| lavandulol                    | 0.30         | oxide                      | 0.31   |
| α terpineol                   | 0.78         | caryophyllene              |        |
| nerol                         | 0.19         | epoxide                    | 0.66   |
| geraniol                      | 0.49         |                            |        |
| Ketones                       | 1.21%        | Esters                     | 45.22% |
| 3-octanone                    | 0.60         | hexyl acetate              | 0.14   |
| camphor                       | 0.61         | hexyl butyrate             | 0.22   |
|                               |              | linalyl acetate            | 43.28  |
|                               |              | lavandulyl acetate         | 1.28   |
|                               |              | neryl acetate              | 0.30   |
|                               |              | Aliphatic alcohols         | 0.13%  |
|                               |              | 3-octanol                  | 0.13%  |
| Total                         |              | 95.30%                     |        |
| Date of Analysis Table Issued |              | December 3, 2019           |        |

Table S4. Raw data of the dendritic cell activation assay to calculate EC<sub>150</sub> and CV<sub>70</sub>

|                                      |              | %Viability | CD86 <sup>+</sup><br>FL1<br>positivity<br>(%) | Isotype <sup>+</sup><br>FL1<br>positivity<br>(%) | S.I. (%) |                                      |              | %Viability | CD86 <sup>+</sup><br>FL1<br>positivity<br>(%) | Isotype <sup>+</sup><br>FL1<br>positivity<br>(%) | S.I. (%) |                                      |              | %Viability | CD86 <sup>+</sup><br>FL1<br>positivity<br>(%) | Isotype <sup>+</sup><br>FL1<br>positivity<br>(%) | S.I. (%) |
|--------------------------------------|--------------|------------|-----------------------------------------------|--------------------------------------------------|----------|--------------------------------------|--------------|------------|-----------------------------------------------|--------------------------------------------------|----------|--------------------------------------|--------------|------------|-----------------------------------------------|--------------------------------------------------|----------|
| culture medium                       | Experiment 1 | 98         | 9.6                                           | 1.3                                              |          | culture medium                       | Experiment 1 | 98         | 9.6                                           | 1.3                                              |          | culture medium                       | Experiment 1 | 91.7       | 10.8                                          | 1.1                                              |          |
|                                      | Experiment 2 | 96.2       | 12.2                                          | 1.4                                              |          |                                      | Experiment 2 | 97         | 9                                             | 0.8                                              |          |                                      | Experiment 2 | 96.7       | 12.5                                          | 1.1                                              |          |
| DMSO                                 | Experiment 1 | 97.7       | 22                                            | 0.8                                              |          | DMSO                                 | Experiment 1 | 97.7       | 22                                            | 0.8                                              |          | DMSO                                 | Experiment 1 | 91.4       | 27.3                                          | 0.6                                              |          |
|                                      | Experiment 2 | 96.4       | 22.9                                          | 1.1                                              |          |                                      | Experiment 2 | 94.9       | 16.8                                          | 0.2                                              |          |                                      | Experiment 2 | 95.9       | 22.1                                          | 0.6                                              |          |
| TNBS                                 | Experiment 1 | 96.4       | 34.2                                          | 7.7                                              | 320.3    | TNBS                                 | Experiment 1 | 96.4       | 34.2                                          | 7.7                                              | 320.3    | TNBS                                 | Experiment 1 | 80.8       | 81                                            | 10.2                                             | 731.2    |
|                                      | Experiment 2 | 94.9       | 47.9                                          | 4.6                                              | 399.9    |                                      | Experiment 2 | 95.2       | 29.2                                          | 1.2                                              | 342.2    |                                      | Experiment 2 | 95.5       | 35.7                                          | 5.4                                              | 266.8    |
| 50 µg/mL                             | Experiment 1 | 97.4       | 11.5                                          | 1.9                                              | 115      | 50 µg/mL                             | Experiment 1 | 97.4       | 11.5                                          | 1.9                                              | 115      | 50 µg/mL                             | Experiment 1 | 96.2       | 10.1                                          | 1.1                                              | 93.3     |
|                                      | Experiment 2 | 94.4       | 11.7                                          | 1.4                                              | 95.1     |                                      | Experiment 2 | 96.4       | 8.4                                           | 0.7                                              | 94.4     |                                      | Experiment 2 | 95.4       | 12.6                                          | 1.4                                              | 98.6     |
| lactic acid                          | Experiment 1 | 97.6       | 23                                            | 1.1                                              | 103      | lactic acid                          | Experiment 1 | 96.6       | 23.7                                          | 1.1                                              | 103.8    | lactic acid                          | Experiment 1 | 97.1       | 23.8                                          | 1                                                | 85.3     |
|                                      | Experiment 2 | 96.2       | 27.9                                          | 1.5                                              | 121.6    |                                      | Experiment 2 | 96.2       | 21                                            | 0.4                                              | 124.1    |                                      | Experiment 2 | 96.5       | 18.9                                          | 0.7                                              | 84.7     |
| 200 µg/mL                            | Experiment 1 | 94.3       | 30.2                                          | 0.7                                              | 138.8    | 200 µg/mL                            | Experiment 1 | 94.8       | 28.3                                          | 1.2                                              | 124.1    | 200 µg/mL                            | Experiment 1 | 94.2       | 23.9                                          | 0.9                                              | 86.3     |
|                                      | Experiment 2 | 61.4       | 39.6                                          | 0.9                                              | 177.2    |                                      | Experiment 2 | 94         | 25.9                                          | 0.3                                              | 154.1    |                                      | Experiment 2 | 95.1       | 20.2                                          | 0.7                                              | 91.1     |
| <i>L. angustifolia</i> essential oil | Experiment 1 | 0.35       | 12.3                                          | 50                                               | -177.3   | <i>L. angustifolia</i> essential oil | Experiment 1 | 86.4       | 40.4                                          | 1.2                                              | 179.8    | <i>L. angustifolia</i> essential oil | Experiment 1 | 86.2       | 29.7                                          | 2.8                                              | 101.1    |
|                                      | Experiment 2 | 0.041      | 33.4                                          | 33.3                                             | 0.5      |                                      | Experiment 2 | 81.4       | 42.9                                          | 0.5                                              | 255.5    |                                      | Experiment 2 | 87.6       | 24.5                                          | 1.1                                              | 109      |
| 0.01%                                | Experiment 1 | 94.3       | 30.2                                          | 0.7                                              | 138.8    | 0.01%                                | Experiment 1 | 94.8       | 28.3                                          | 1.2                                              | 124.1    | 0.01%                                | Experiment 1 | 94.2       | 23.9                                          | 0.9                                              | 86.3     |
|                                      | Experiment 2 | 61.4       | 39.6                                          | 0.9                                              | 177.2    |                                      | Experiment 2 | 94         | 25.9                                          | 0.3                                              | 154.1    |                                      | Experiment 2 | 95.1       | 20.2                                          | 0.7                                              | 91.1     |
| 0.02%                                | Experiment 1 | 0.35       | 12.3                                          | 50                                               | -177.3   | 0.02%                                | Experiment 1 | 86.4       | 40.4                                          | 1.2                                              | 179.8    | 0.02%                                | Experiment 1 | 86.2       | 29.7                                          | 2.8                                              | 101.1    |
|                                      | Experiment 2 | 0.041      | 33.4                                          | 33.3                                             | 0.5      |                                      | Experiment 2 | 81.4       | 42.9                                          | 0.5                                              | 255.5    |                                      | Experiment 2 | 87.6       | 24.5                                          | 1.1                                              | 109      |
| 0.04%                                | Experiment 1 | 0.35       | 12.3                                          | 50                                               | -177.3   | 0.04%                                | Experiment 1 | 86.4       | 40.4                                          | 1.2                                              | 179.8    | 0.04%                                | Experiment 1 | 86.2       | 29.7                                          | 2.8                                              | 101.1    |
|                                      | Experiment 2 | 0.041      | 33.4                                          | 33.3                                             | 0.5      |                                      | Experiment 2 | 81.4       | 42.9                                          | 0.5                                              | 255.5    |                                      | Experiment 2 | 87.6       | 24.5                                          | 1.1                                              | 109      |
| 1 µg/mL                              | Experiment 1 | 94.3       | 30.2                                          | 0.7                                              | 138.8    | 1 µg/mL                              | Experiment 1 | 94.8       | 28.3                                          | 1.2                                              | 124.1    | 1 µg/mL                              | Experiment 1 | 94.2       | 23.9                                          | 0.9                                              | 86.3     |
|                                      | Experiment 2 | 61.4       | 39.6                                          | 0.9                                              | 177.2    |                                      | Experiment 2 | 94         | 25.9                                          | 0.3                                              | 154.1    |                                      | Experiment 2 | 95.1       | 20.2                                          | 0.7                                              | 91.1     |
| 5 µg/mL                              | Experiment 1 | 0.35       | 12.3                                          | 50                                               | -177.3   | 5 µg/mL                              | Experiment 1 | 86.4       | 40.4                                          | 1.2                                              | 179.8    | 5 µg/mL                              | Experiment 1 | 86.2       | 29.7                                          | 2.8                                              | 101.1    |
|                                      | Experiment 2 | 0.041      | 33.4                                          | 33.3                                             | 0.5      |                                      | Experiment 2 | 81.4       | 42.9                                          | 0.5                                              | 255.5    |                                      | Experiment 2 | 87.6       | 24.5                                          | 1.1                                              | 109      |
| 10 µg/mL                             | Experiment 1 | 94.3       | 30.2                                          | 0.7                                              | 138.8    | 10 µg/mL                             | Experiment 1 | 94.8       | 28.3                                          | 1.2                                              | 124.1    | 10 µg/mL                             | Experiment 1 | 94.2       | 23.9                                          | 0.9                                              | 86.3     |
|                                      | Experiment 2 | 61.4       | 39.6                                          | 0.9                                              | 177.2    |                                      | Experiment 2 | 94         | 25.9                                          | 0.3                                              | 154.1    |                                      | Experiment 2 | 95.1       | 20.2                                          | 0.7                                              | 91.1     |
| 20 µg/mL                             | Experiment 1 | 0.35       | 12.3                                          | 50                                               | -177.3   | 20 µg/mL                             | Experiment 1 | 86.4       | 40.4                                          | 1.2                                              | 179.8    | 20 µg/mL                             | Experiment 1 | 86.2       | 29.7                                          | 2.8                                              | 101.1    |
|                                      | Experiment 2 | 0.041      | 33.4                                          | 33.3                                             | 0.5      |                                      | Experiment 2 | 81.4       | 42.9                                          | 0.5                                              | 255.5    |                                      | Experiment 2 | 87.6       | 24.5                                          | 1.1                                              | 109      |
| 40 µg/mL                             | Experiment 1 | 94.3       | 30.2                                          | 0.7                                              | 138.8    | 40 µg/mL                             | Experiment 1 | 94.8       | 28.3                                          | 1.2                                              | 124.1    | 40 µg/mL                             | Experiment 1 | 94.2       | 23.9                                          | 0.9                                              | 86.3     |
|                                      | Experiment 2 | 61.4       | 39.6                                          | 0.9                                              | 177.2    |                                      | Experiment 2 | 94         | 25.9                                          | 0.3                                              | 154.1    |                                      | Experiment 2 | 95.1       | 20.2                                          | 0.7                                              | 91.1     |
| LA                                   | Experiment 1 | 0.35       | 12.3                                          | 50                                               | -177.3   | LA                                   | Experiment 1 | 86.4       | 40.4                                          | 1.2                                              | 179.8    | LA                                   | Experiment 1 | 86.2       | 29.7                                          | 2.8                                              | 101.1    |
|                                      | Experiment 2 | 0.041      | 33.4                                          | 33.3                                             | 0.5      |                                      | Experiment 2 | 81.4       | 42.9                                          | 0.5                                              | 255.5    |                                      | Experiment 2 | 87.6       | 24.5                                          | 1.1                                              | 109      |
| -                                    | Experiment 1 | 94.3       | 30.2                                          | 0.7                                              | 138.8    | -                                    | Experiment 1 | 94.8       | 28.3                                          | 1.2                                              | 124.1    | -                                    | Experiment 1 | 94.2       | 23.9                                          | 0.9                                              | 86.3     |
|                                      | Experiment 2 | 61.4       | 39.6                                          | 0.9                                              | 177.2    |                                      | Experiment 2 | 94         | 25.9                                          | 0.3                                              | 154.1    |                                      | Experiment 2 | 95.1       | 20.2                                          | 0.7                                              | 91.1     |
| -                                    | Experiment 1 | 0.35       | 12.3                                          | 50                                               | -177.3   | -                                    | Experiment 1 | 86.4       | 40.4                                          | 1.2                                              | 179.8    | -                                    | Experiment 1 | 86.2       | 29.7                                          | 2.8                                              | 101.1    |
|                                      | Experiment 2 | 0.041      | 33.4                                          | 33.3                                             | 0.5      |                                      | Experiment 2 | 81.4       | 42.9                                          | 0.5                                              | 255.5    |                                      | Experiment 2 | 87.6       | 24.5                                          | 1.1                                              | 109      |
| -                                    | Experiment 1 | 94.3       | 30.2                                          | 0.7                                              | 138.8    | -                                    | Experiment 1 | 94.8       | 28.3                                          | 1.2                                              | 124.1    | -                                    | Experiment 1 | 94.2       | 23.9                                          | 0.9                                              | 86.3     |
|                                      | Experiment 2 | 61.4       | 39.6                                          | 0.9                                              | 177.2    |                                      | Experiment 2 | 94         | 25.9                                          | 0.3                                              | 154.1    |                                      | Experiment 2 | 95.1       | 20.2                                          | 0.7                                              | 91.1     |
| -                                    | Experiment 1 | 0.35       | 12.3                                          | 50                                               | -177.3   | -                                    | Experiment 1 | 86.4       | 40.4                                          | 1.2                                              | 179.8    | -                                    | Experiment 1 | 86.2       | 29.7                                          | 2.8                                              | 101.1    |
|                                      | Experiment 2 | 0.041      | 33.4                                          | 33.3                                             | 0.5      |                                      | Experiment 2 | 81.4       | 42.9                                          | 0.5                                              | 255.5    |                                      | Experiment 2 | 87.6       | 24.5                                          | 1.1                                              | 109      |
| -                                    | Experiment 1 | 94.3       | 30.2                                          | 0.7                                              | 138.8    | -                                    | Experiment 1 | 94.8       | 28.3                                          | 1.2                                              | 124.1    | -                                    | Experiment 1 | 94.2       | 23.9                                          | 0.9                                              | 86.3     |
|                                      | Experiment 2 | 61.4       | 39.6                                          | 0.9                                              | 177.2    |                                      | Experiment 2 | 94         | 25.9                                          | 0.3                                              | 154.1    |                                      | Experiment 2 | 95.1       | 20.2                                          | 0.7                                              | 91.1     |
| -                                    | Experiment 1 | 0.35       | 12.3                                          | 50                                               | -177.3   | -                                    | Experiment 1 | 86.4       | 40.4                                          | 1.2                                              | 179.8    | -                                    | Experiment 1 | 86.2       | 29.7                                          | 2.8                                              | 101.1    |
|                                      | Experiment 2 | 0.041      | 33.4                                          | 33.3                                             | 0.5      |                                      | Experiment 2 | 81.4       | 42.9                                          | 0.5                                              | 255.5    |                                      | Experiment 2 | 87.6       | 24.5                                          | 1.1                                              | 109      |
| -                                    | Experiment 1 | 94.3       | 30.2                                          | 0.7                                              | 138.8    | -                                    | Experiment 1 | 94.8       | 28.3                                          | 1.2                                              | 124.1    | -                                    | Experiment 1 | 94.2       | 23.9                                          | 0.9                                              | 86.3     |
|                                      | Experiment 2 | 61.4       | 39.6                                          | 0.9                                              | 177.2    |                                      | Experiment 2 | 94         | 25.9                                          | 0.3                                              | 154.1    |                                      | Experiment 2 | 95.1       | 20.2                                          | 0.7                                              | 91.1     |
| -                                    | Experiment 1 | 0.35       | 12.3                                          | 50                                               | -177.3   | -                                    | Experiment 1 | 86.4       | 40.4                                          | 1.2                                              | 179.8    | -                                    | Experiment 1 | 86.2       | 29.7                                          | 2.8                                              | 101.1    |
|                                      | Experiment 2 | 0.041      | 33.4                                          | 33.3                                             | 0.5      |                                      | Experiment 2 | 81.4       | 42.9                                          | 0.5                                              | 255.5    |                                      | Experiment 2 | 87.6       | 24.5                                          | 1.1                                              | 109      |
| -                                    | Experiment 1 | 94.3       | 30.2                                          | 0.7                                              | 138.8    | -                                    | Experiment 1 | 94.8       | 28.3                                          | 1.2                                              | 124.1    | -                                    | Experiment 1 | 94.2       | 23.9                                          | 0.9                                              | 86.3     |
|                                      | Experiment 2 | 61.4       | 39.6                                          | 0.9                                              | 177.2    |                                      | Experiment 2 | 94         | 25.9                                          | 0.3                                              | 154.1    |                                      | Experiment 2 | 95.1       | 20.2                                          | 0.7                                              | 91.1     |
| -                                    | Experiment 1 | 0.35       | 12.3                                          | 50                                               | -177.3   | -                                    | Experiment 1 | 86.4       | 40.4                                          | 1.2                                              | 179.8    | -                                    | Experiment 1 | 86.2       | 29.7                                          | 2.8                                              | 101.1    |
|                                      | Experiment 2 | 0.041      | 33.4                                          | 33.3                                             | 0.5      |                                      | Experiment 2 | 81.4       | 42.9                                          | 0.5                                              | 255.5    |                                      | Experiment 2 | 87.6       | 24.5                                          | 1.1                                              | 109      |
| -                                    | Experiment 1 | 94.3       | 30.2                                          | 0.7                                              | 138.8    | -                                    | Experiment 1 | 94.8       | 28.3                                          | 1.2                                              | 124.1    | -                                    | Experiment 1 | 94.2       | 23.9                                          | 0.9                                              | 86.3     |
|                                      | Experiment 2 | 61.4       | 39.6                                          | 0.9                                              | 177.2    |                                      | Experiment 2 | 94         | 25.9                                          | 0.3                                              | 154.1    |                                      | Experiment 2 | 95.1       | 20.2                                          | 0.7                                              | 91.1     |
| -                                    | Experiment 1 | 0.35       | 12.3                                          | 50                                               | -177.3   | -                                    | Experiment 1 | 86.4       | 40.4                                          | 1.2                                              | 179.8    | -                                    | Experiment 1 | 86.2       | 29.7                                          | 2.8                                              | 101.1    |
|                                      | Experiment 2 | 0.041      | 33.4                                          | 33.3                                             | 0.5      |                                      | Experiment 2 | 81.4       | 42.9                                          | 0.5                                              | 255.5    |                                      | Experiment 2 | 87.6       | 24.5                                          | 1.1                                              | 109      |
| -                                    | Experiment 1 | 94.3       | 30.2                                          | 0.7                                              | 138.8    | -                                    | Experiment 1 | 94.8       | 28.3                                          | 1.2                                              | 124.1    | -                                    | Experiment 1 | 94.2       | 23.9                                          | 0.9                                              | 86.3     |
|                                      | Experiment 2 | 61.4       | 39.6                                          | 0.9                                              | 177.2    |                                      | Experiment 2 | 94         | 25.9                                          | 0.3                                              | 154.1    |                                      | Experiment 2 | 95.1       | 20.2                                          | 0.7                                              | 91.1     |
| -                                    | Experiment 1 | 0.35       | 12.3                                          | 50                                               | -177.3   | -                                    | Experiment 1 | 86.4       | 40.4                                          | 1.2                                              | 179.8    | -                                    | Experiment 1 | 86.2       | 29.7                                          | 2.8                                              | 101.1    |
|                                      | Experiment 2 | 0.041      | 33.4                                          | 33.3                                             | 0.5      |                                      | Experiment 2 | 81.4       | 42.9                                          | 0.5                                              | 255.5    |                                      | Experiment 2 | 87.6       | 24.5                                          | 1.1                                              | 109      |
| -                                    | Experiment 1 | 94.3       | 30.2                                          | 0.7                                              | 138.8    | -                                    | Experiment 1 | 94.8       | 28.3                                          | 1.2                                              | 124.1    | -                                    | Experiment 1 | 94.2       | 23.9                                          | 0.9                                              | 86.3     |
|                                      | Experiment 2 | 61.4       | 39.6                                          | 0.9                                              | 177.2    |                                      | Experiment 2 | 94         | 25.9                                          | 0.3                                              | 154.1    |                                      | Experiment 2 | 95.1       | 20.2                                          | 0.7                                              | 91.1     |
| -                                    | Experiment 1 | 0.35       | 12.3                                          | 50                                               | -177.3   | -                                    | Experiment 1 | 86.4       | 40.4                                          | 1.2                                              | 179.8    | -                                    | Experiment 1 | 86.2       | 29.7                                          | 2.8                                              | 101.1    |
|                                      | Experiment 2 | 0.041      | 33.4                                          | 33.3                                             | 0.5      |                                      | Experiment 2 | 81.4       | 42.9                                          | 0.5                                              | 255.5    |                                      | Experiment 2 | 87.6       | 24.5                                          | 1.1                                              | 109      |
| -                                    | Experiment 1 | 94.3       | 30.2                                          | 0.7                                              | 138.8    | -                                    | Experiment 1 | 94.8       | 28.3                                          | 1.2                                              | 124.1    | -                                    | Experiment 1 | 94.2       | 23.9                                          | 0.9                                              | 86.3     |
|                                      | Experiment 2 | 61.4       | 39.6                                          | 0.9                                              | 177.2    |                                      | Experiment 2 | 94         | 25.9                                          | 0.3                                              | 154.1    |                                      | Experiment 2 | 95.1       | 20.2                                          | 0.7                                              | 91.1     |
| -                                    | Experiment 1 | 0.35       | 12.3                                          | 50                                               | -177.3   | -                                    | Experiment 1 | 86.4       | 40.4                                          | 1.2                                              | 179.8    | -                                    | Experiment 1 | 86.2       | 29.7                                          | 2.8                                              | 101.1    |
|                                      | Experiment 2 | 0.041      | 33.4                                          | 33.3                                             | 0.5      |                                      | Experiment 2 | 81.4       | 42.9                                          | 0.5                                              | 255.5    |                                      | Experiment 2 | 87.6       | 24.5                                          | 1.1                                              | 109      |
| -                                    | Experiment 1 | 94.3       | 30.2                                          | 0.7                                              | 138.8    | -                                    | Experiment 1 | 94.8       | 28.3                                          | 1.2                                              | 124.1    | -                                    | Experiment 1 | 94.2       | 23.9                                          | 0.9                                              | 86.3     |
|                                      | Experiment 2 | 61.4       | 39.6                                          | 0.9                                              | 177.2    |                                      | Experiment 2 | 94         | 25.9                                          | 0.3                                              | 154.1    |                                      | Experiment 2 | 95.1       | 20.2                                          | 0.7                                              | 91.1     |
| -                                    | Experiment 1 | 0.35       | 12.3                                          | 50                                               | -177.3   | -                                    | Experiment 1 | 86.4       | 40.4                                          | 1.2                                              | 179.8    | -                                    | Experiment 1 | 86.2       | 29.7                                          | 2.8                                              | 101.1    |
|                                      | Experiment 2 | 0.041      | 33.4                                          | 33.3                                             | 0.5      |                                      | Experiment 2 | 81.4       | 42.9                                          | 0.5                                              | 255.5    |                                      | Experiment 2 | 87.6       | 24.5                                          |                                                  |          |
